# Supplementary material for: A New Approach for a Safe and Reproducible Seeds Positioning for Diffusing Alpha-Emitters Radiation Therapy of Squamous Cell Skin Cancer: A Feasibility Study
Source: MDPI journal article supplement (doi:10.3390/cancers14010240), 2022-01-04
Supplement: s1 [file s1]

# Supplementary materials: A New Approach for a Safe and Reproducible Seeds Positioning for Diffusing Alpha-Emitters Radiation Therapy of Squamous Cell Skin Cancer: A Feasibility Study

Giacomo Feliciani, Salvatore Roberto Bellia, Massimo Del Duca, Giorgio Mazzotti, Manuela Monti, Ignazio Stanganelli, Yona Keisari, Itzhak Kelson, Aron Popovtzer, Antonino Romeo and Anna Sarnelli

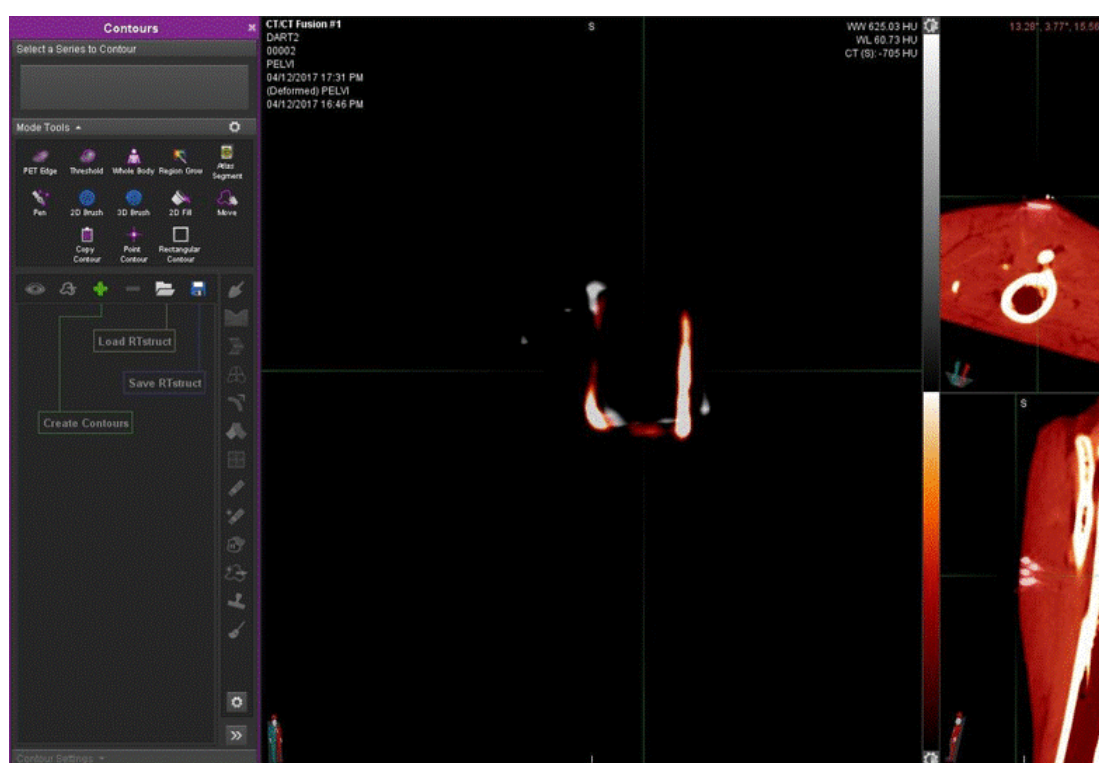

**Figure S1.** Animated GIF showing the rigid fusion between pre and post implant CT of the phantom in coronal view.

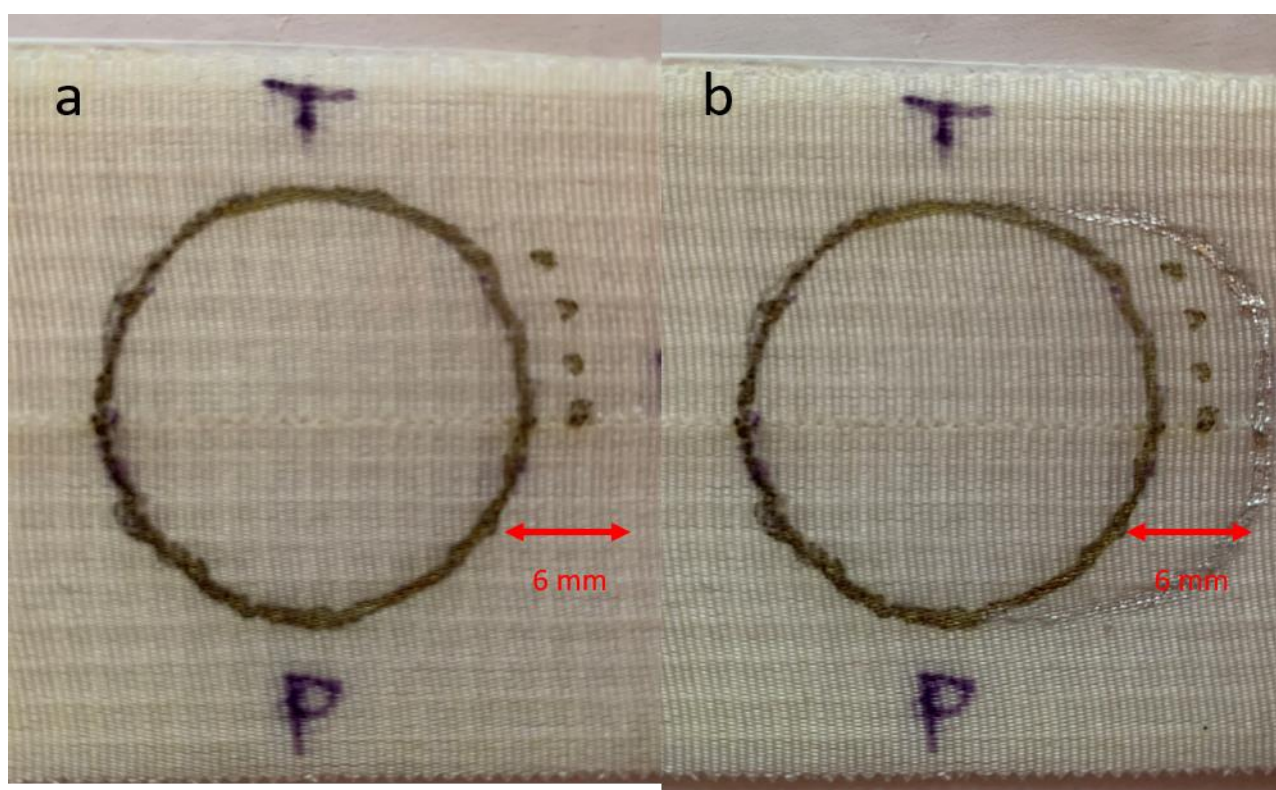

**Figure S2.** (a) CTV contouring of the visible lesion on the template mesh with silver-based ink. (b) Contouring update after consideration about subcutaneous invasion of the tumour based on PET/CT information.
